# Supplementary material for: Discovery of cryptic allosteric sites using reversed allosteric communication by a combined computational and experimental strategy
Source: Royal Society of Chemistry journal article supplement (doi:10.1039/d0sc05131d), 2020-11-02
Supplement: d0sc05131d1.pdf [file d0sc05131d1.pdf]

## Supporting Information

### Discovery of cryptic allosteric sites using reversed allosteric communication by a combined computational and experimental strategy

Duan Ni<sup>a,b,†</sup>, Jiacheng Wei<sup>a,†</sup>, Xinheng He<sup>a,†</sup>, Ashfaq Ur Rehman<sup>a</sup>, Xinyi Li<sup>a</sup>, Yuran Qiu<sup>a</sup>, Jun Pu<sup>d</sup>, Shaoyong Lu<sup>a,c,\*</sup>, Jian Zhang<sup>a,c,\*</sup>

<sup>a</sup> Department of Pathophysiology, Key Laboratory of Cell Differentiation and Apoptosis of Chinese Ministry of Education, Shanghai Jiao Tong University, School of Medicine, Shanghai 200025, China

<sup>b</sup>The Charles Perkins Centre, University of Sydney, Sydney, NSW 2006, Australia

<sup>c</sup>Medicinal Chemistry and Bioinformatics Center, Shanghai Jiao Tong University, School of Medicine, Shanghai 200025, China

<sup>d</sup>Department of Cardiology, Renji Hospital, Shanghai Jiao Tong University, School of Medicine, Shanghai 200120, China

<sup>†</sup>These authors made equal contributions to this work.

\*Corresponding authors

E-mail: [lushaoyong@yeah.net](mailto:lushaoyong@yeah.net) (Dr. Shaoyong Lu)

E-mail: [jian.zhang@sjtu.edu.cn](mailto:jian.zhang@sjtu.edu.cn) (Dr. Jian Zhang)

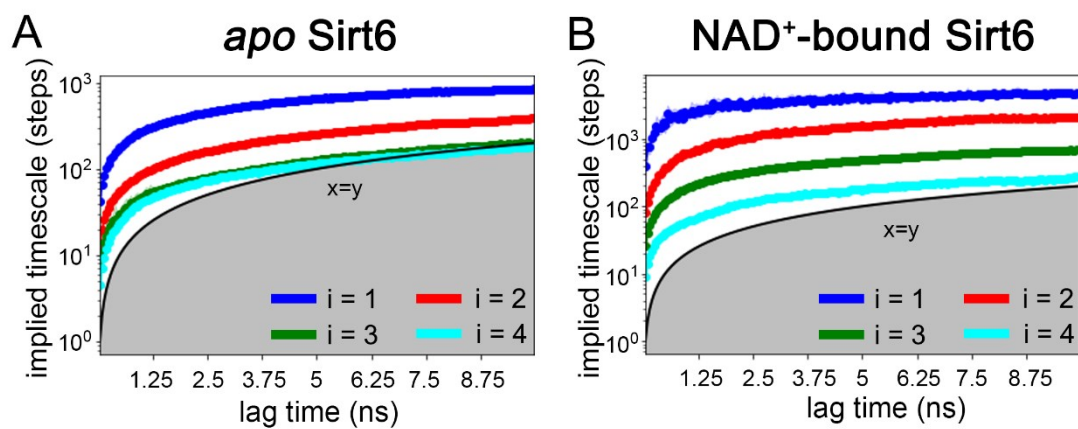

**Figure S1.** The result of implied timescale test for *apo* (A) and *holo* (B) Sirt6. Blue, red, green, and cyan lines show the timescale  $\tau_1$ ,  $\tau_2$ ,  $\tau_3$ , and  $\tau_4$  as a function of lag times. Black lines represent  $x=y$  in logarithmic coordinates.

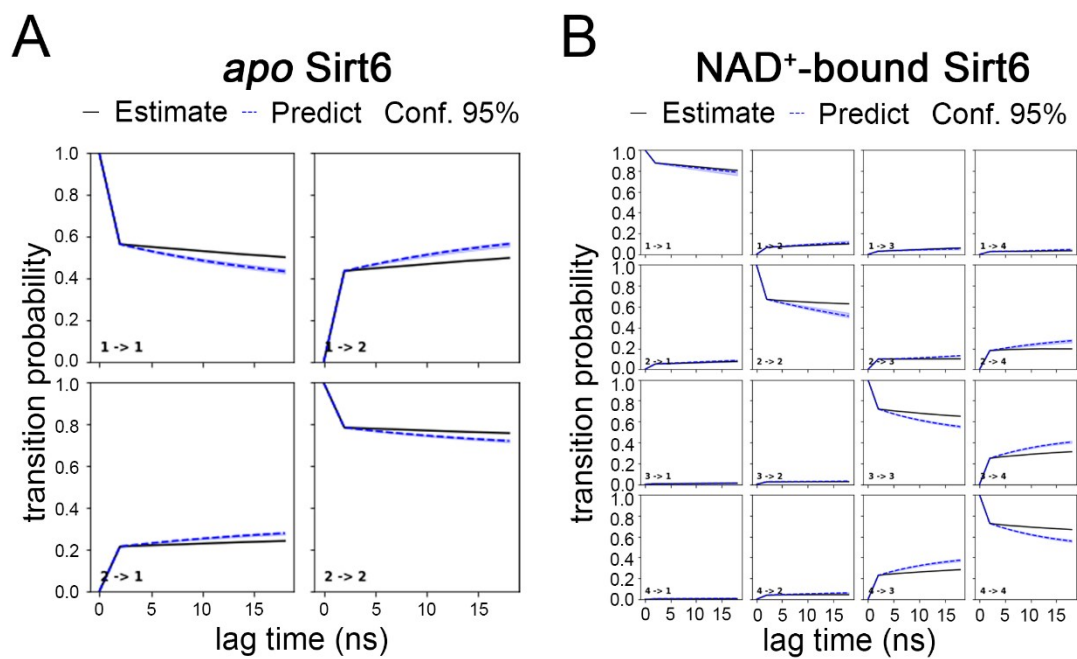

**Figure S2.** The result of the Chapman-Kolmogorov test for 2 metastable states in *apo* Sirt6 (**A**) and 4 metastable states in *holo* Sirt6 (**B**). The solid estimate lines are the transition probability calculated by MSMs, while the dotted predict lines are practical transition probability observed in trajectories.

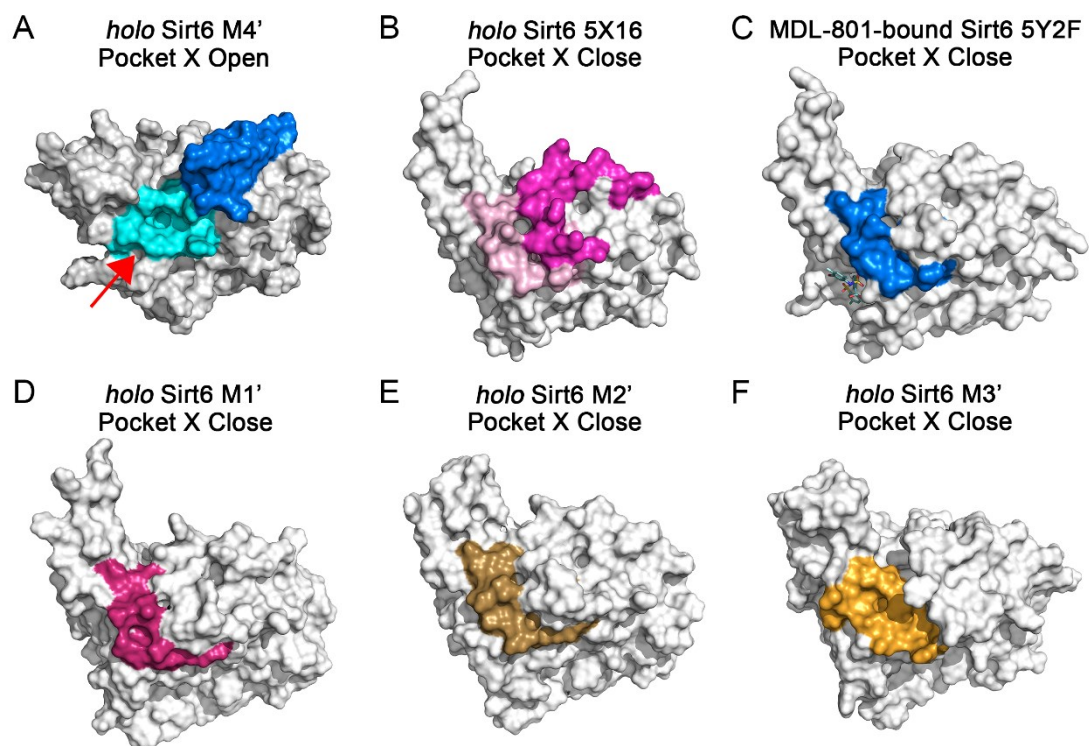

**Figure S3.** Pocket X emerged only in *holo* Sirt6 M4' metastable state (**A**), while was invisible in crystal structures 5X16 (**B**), 5Y2F (**C**), and *holo* Sirt6 M1'-M3 metastable states (**D-F**).

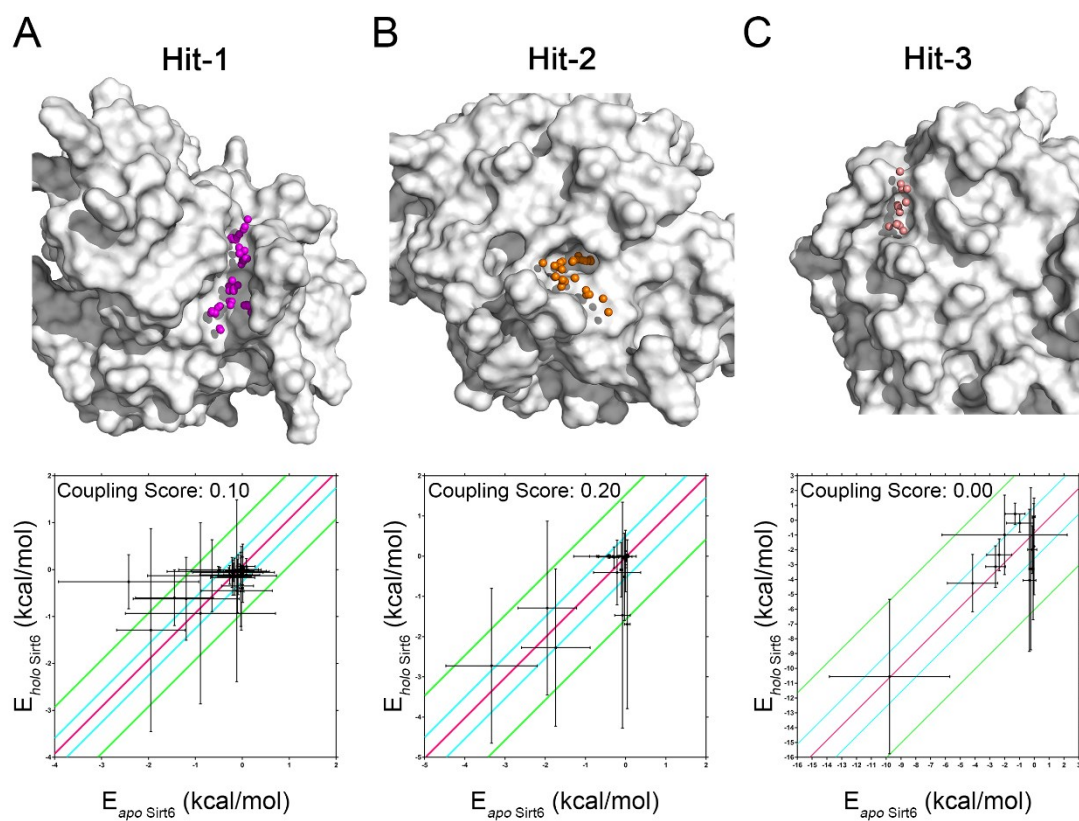

**Figure S4.** Representative Fpocket hits (A-C) failed to pass energy coupling score analyses for allosteric signal testing.
